# Supplementary material for: Unsupervised machine learning for identifying important visual features through bag-of-words using histopathology data from chronic kidney disease
Source: PubMed Central journal article supplement (PMC8941143; doi:10.1038/s41598-022-08974-8), 2022-03-22
Supplement: 41598_2022_8974_MOESM1_ESM.pdf [file 41598_2022_8974_MOESM1_ESM.pdf]

# **Unsupervised machine learning for identifying important visual features through Bag-of-Words using histopathology data from Chronic Kidney Disease**

Joonsang Lee<sup>1</sup>, Elisa Warner<sup>1</sup>, Salma Shaikhouni<sup>3</sup>, Markus Bitzer<sup>3</sup>, Matthias Kretzler<sup>3</sup>, Debbie Gipson<sup>4</sup>, Subramaniam Pennathur<sup>3</sup>, Keith Bellovich<sup>5</sup>, Zeenat Bhat<sup>6</sup>, Crystal Gadegbeku<sup>7</sup>, Susan Massengill<sup>8</sup>, Kalyani Perumal<sup>9</sup>, Jharna Saha<sup>2</sup>, Yingbao Yang<sup>2</sup>, Jinghui Luo,<sup>2</sup> Xin Zhang<sup>1</sup>, Laura Mariani<sup>3</sup>, Jeffrey B. Hodgin<sup>2,\*†</sup> & Arvind Rao<sup>1,10,11,12,\*†</sup>, for the C-PROBE Study.

<sup>1</sup>Department of Computational Medicine and Bioinformatics, University of Michigan, Ann Arbor, MI, USA

<sup>2</sup>Department of Pathology, University of Michigan, Ann Arbor, MI, USA

<sup>3</sup>Department of Internal Medicine, Nephrology, University of Michigan, Ann Arbor, MI, USA

<sup>4</sup>Department of Pediatrics, Pediatric Nephrology, University of Michigan, Ann Arbor, MI, USA

<sup>5</sup>Department of Internal Medicine, Nephrology, St. Clair Nephrology Research, Detroit, MI, USA

<sup>6</sup>Department of Internal Medicine, Nephrology, Wayne State University, Detroit, MI, USA

<sup>7</sup>Department of Internal Medicine, Nephrology, Cleveland Clinic, Cleveland, OH, USA

<sup>8</sup>Department of Pediatrics, Pediatric Nephrology, Levine Children's Hospital, Charlotte, NC, USA

<sup>9</sup>Department of Internal Medicine, Nephrology, Department of JH Stroger Hospital, Chicago, IL, USA

<sup>10</sup>Department of Biostatistics, University of Michigan, Ann Arbor, MI, USA

<sup>11</sup>Department of Radiation Oncology, University of Michigan, Ann Arbor, MI, USA

<sup>12</sup>Department of Biomedical Engineering, University of Michigan, Ann Arbor, MI, USA

\*Correspondence and requests for materials should be addressed to J.B.H. (email:

[jhodgin@med.umich.edu](mailto:jhodgin@med.umich.edu)) & A.R. (email: [ukarvind@med.umich.edu](mailto:ukarvind@med.umich.edu))

†Both authors contributed equally to this work

**Table S1.** Confusion matrix and AUC for all features

|                 |   | Prediction  |    |
|-----------------|---|-------------|----|
|                 |   | 0           | 1  |
| Actual          | 0 | 34          | 2  |
|                 | 1 | 4           | 17 |
| <b>Accuracy</b> |   | 0.89        |    |
| <b>AUC</b>      |   | 0.91        |    |
| <b>95% CI</b>   |   | 0.83 – 0.99 |    |

**0:** eGFR  $\geq$  60, **1:** eGFR < 60, **CI:** confidence interval

**Table S2.** Confusion matrix and AUC for the dichotomized eGFR for the top 7 features

|                 |   | Prediction |    |
|-----------------|---|------------|----|
|                 |   | 0          | 1  |
| Actual          | 0 | 34         | 2  |
|                 | 1 | 2          | 19 |
| <b>Accuracy</b> |   | 0.93       |    |
| <b>AUC</b>      |   | 0.93       |    |
| <b>95% CI</b>   |   | 0.86 – 1.0 |    |

**0:** eGFR  $\geq$  60, **1:** eGFR < 60, **CI:** confidence interval

**Table S3.** Confusion matrix and AUC for the eGFR slope for the top 7 features

|                 |   | Prediction  |    |
|-----------------|---|-------------|----|
|                 |   | 0           | 1  |
| Actual          | 0 | 25          | 5  |
|                 | 1 | 6           | 21 |
| <b>Accuracy</b> |   | 0.81        |    |
| <b>AUC</b>      |   | 0.80        |    |
| <b>95% CI</b>   |   | 0.62 – 0.89 |    |

**0:** eGFR slope < 0, **1:** eGFR slope  $\geq$  0, **CI:** confidence interval

**Table S4.** Clinical data for 57 CKD patients

| Patients | Age | Gender | Race                           | Diagnosis                                                                  | eGFR   | UPC  |
|----------|-----|--------|--------------------------------|----------------------------------------------------------------------------|--------|------|
| 1        | 33  | Female | White/Caucasian                | Lupus Class III                                                            | 96.87  | 2.27 |
| 2        | 39  | Female | White/Caucasian                | Lupus Class V, MPGN                                                        | 90.93  | 1.46 |
| 3        | 34  | Female | White/Caucasian                | Lupus Class V                                                              | 118.92 | 1.9  |
| 4        | 32  | Female | Black/African American         | Lupus Class III, Lupus Class IV                                            | 113.06 | 0.43 |
| 5        | 24  | Female | Asian/Asian American           | Lupus Class III                                                            | 121.27 | 1.87 |
| 6        | 49  | Male   | White/Caucasian                | Minimal Change                                                             | 70.58  | 7.71 |
| 7        | 23  | Female | White/Caucasian                | HSP                                                                        | 122.12 | 0.48 |
| 8        | 46  | Male   | White/Caucasian                | FSGS, IgA Nephropathy                                                      | 47.31  | 2.2  |
| 9        | 19  | Female | American Indian/Alaskan Native | FSGS                                                                       | 119.68 | 0.9  |
| 10       | 66  | Female | White/Caucasian                | Diabetic nephropathy                                                       | 26.62  | 4.6  |
| 11       | 68  | Female | White/Caucasian                | Minimal change, FSGS                                                       | 27.63  | 3.36 |
| 12       | 20  | Male   | Black/African American         | FSGS                                                                       | 70.82  | 1.27 |
| 13       | 5   | Male   | White/Caucasian                | FSGS                                                                       | 118.9  | 1.86 |
| 14       | 41  | Female | Black/African American         | Lupus Class V, hypertensive nephropathy                                    | 43.59  | 0.15 |
| 15       | 51  | Female | Black/African American         | Lupus Class III, lupus Class V                                             | 98.93  | 8.25 |
| 16       | 40  | Female | White/Caucasian                | Lupus nephritis                                                            | 79.98  | 5.37 |
| 17       | 11  | Female | White/Caucasian                | HSP                                                                        | 160.93 | 1.72 |
| 18       | 38  | Female | White/Caucasian                | IgA Nephropathy                                                            | 93.52  | 5.97 |
| 19       | 22  | Female | White/Caucasian                | Lupus Class II, MPGN                                                       | 104.65 | 2.69 |
| 20       | 37  | Female | Black/African American         | Lupus Class V                                                              | 83.35  | 2.48 |
| 21       | 48  | Female | White/Caucasian                | Lupus Class III                                                            | 107.78 | 2.9  |
| 22       | 58  | Female | White/Caucasian                | FSGS                                                                       | 32.67  | 0.21 |
| 23       | 55  | Male   | Asian/Asian American           | IgA Nephropathy, Hypertensive nephropathy                                  | 34.4   | 2.95 |
| 24       | 91  | Male   | White/Caucasian                | Glomerular disease                                                         | 22.96  | 2.23 |
| 25       | 45  | Female | White/Caucasian                | Membranous Nephropathy                                                     | 105.13 | 3.9  |
| 26       | 56  | Male   | White/Caucasian                | Glomerular disease                                                         | 96.94  | 0.08 |
| 27       | 19  | Female | Black/African American         | Lupus class IV                                                             | 95.905 | 1.65 |
| 28       | 80  | Male   | White/Caucasian                | FSGS, tubulointerstitial disease                                           | 30.8   | 8.13 |
| 29       | 26  | Female | Multiracial                    | Lupus class III, Lupus class IV                                            | 142.74 | 0.73 |
| 30       | 6   | Male   | White/Caucasian                | IgA Nephropathy                                                            | 131.41 | 3.41 |
| 31       | 26  | Female | Black/African American         | Lupus Class V                                                              | 117.93 | 0    |
| 32       | 20  | Female | White/Caucasian                | Lupus Class II                                                             | 109.43 | 0.06 |
| 33       | 51  | Female | White/Caucasian                | Lupus Class III                                                            | 85.36  | 2.69 |
| 34       | 29  | Female | White/Caucasian                | Lupus Class V                                                              | 109.48 | 2.19 |
| 35       | 45  | Female | #N/A                           | Lupus Class V                                                              | 111.95 | 1.56 |
| 36       | 30  | Female | Black/African American         | Lupus Class V                                                              | 73.94  | 4.51 |
| 37       | 73  | Male   | White/Caucasian                | Diabetic nephropathy, hypertensive nephropathy                             | 66.24  | 1.49 |
| 38       | 59  | Male   |                                |                                                                            |        |      |
| 39       | 37  | Female | White/Caucasian                | Diabetic nephropathy, hypertensive nephropathy, Tubulointerstitial disease | 19.52  | 9.11 |
| 40       | 53  | Female | White/Caucasian                | Diabetic nephropathy                                                       | 15.75  | 1.39 |
| 41       | 58  | Male   | White/Caucasian                | Diabetic nephropathy                                                       | 56.05  | 0.91 |
| 42       | 42  | Female | White/Caucasian                | Diabetic nephropathy                                                       | 44.68  | 6.74 |
| 43       | 69  | Female | Black/African American         | Diabetic nephropathy                                                       | 64.23  | 1.01 |
| 44       | 62  | Male   | White/Caucasian                | Diabetic nephropathy                                                       | 18.29  | 6.49 |
| 45       | 21  | Female | White/Caucasian                | Lupus Class V                                                              | 163.67 | 3.48 |
| 46       | 29  | Female | White/Caucasian                | Lupus Class IV                                                             | 123.17 | 0.99 |
| 47       | 7   | Female | Asian/Asian American           | Membranous Nephropathy                                                     | 180.4  | 3.19 |
| 48       | 62  | Male   | White/Caucasian                | IgA Nephropathy                                                            | 53.47  | 0.31 |
| 49       | 71  | Male   | White/Caucasian                | FSGS                                                                       | 46.17  | 2.74 |
| 50       | 36  | Female | #N/A                           | IgA Nephropathy                                                            | 114.22 | 0.43 |
| 51       | 37  | Female | Asian/Asian American           | Glomerular disease                                                         | 114    | 0.42 |
| 52       | 31  | Female | White/Caucasian                | FSGS, IgA Nephropathy                                                      | 51.27  | 1.72 |
| 53       | 51  | Female | Black/African American         | Membranous Nephropathy                                                     | 91.94  | 6.31 |
| 54       | 67  | Male   | Black/African American         | Diabetic nephropathy, Tubulointerstitial disease                           | 25.88  | 5.54 |
| 55       | 48  | Female | White/Caucasian                | Diabetic nephropathy, Lupus Class II                                       | 44.32  | 8.42 |
| 56       | 59  | Female | White/Caucasian                | Diabetic nephropathy                                                       | 25.87  | 8.53 |
| 57       | 48  | Male   | White/Caucasian                | Diabetic nephropathy, FSGS                                                 | 48.72  | 0.53 |

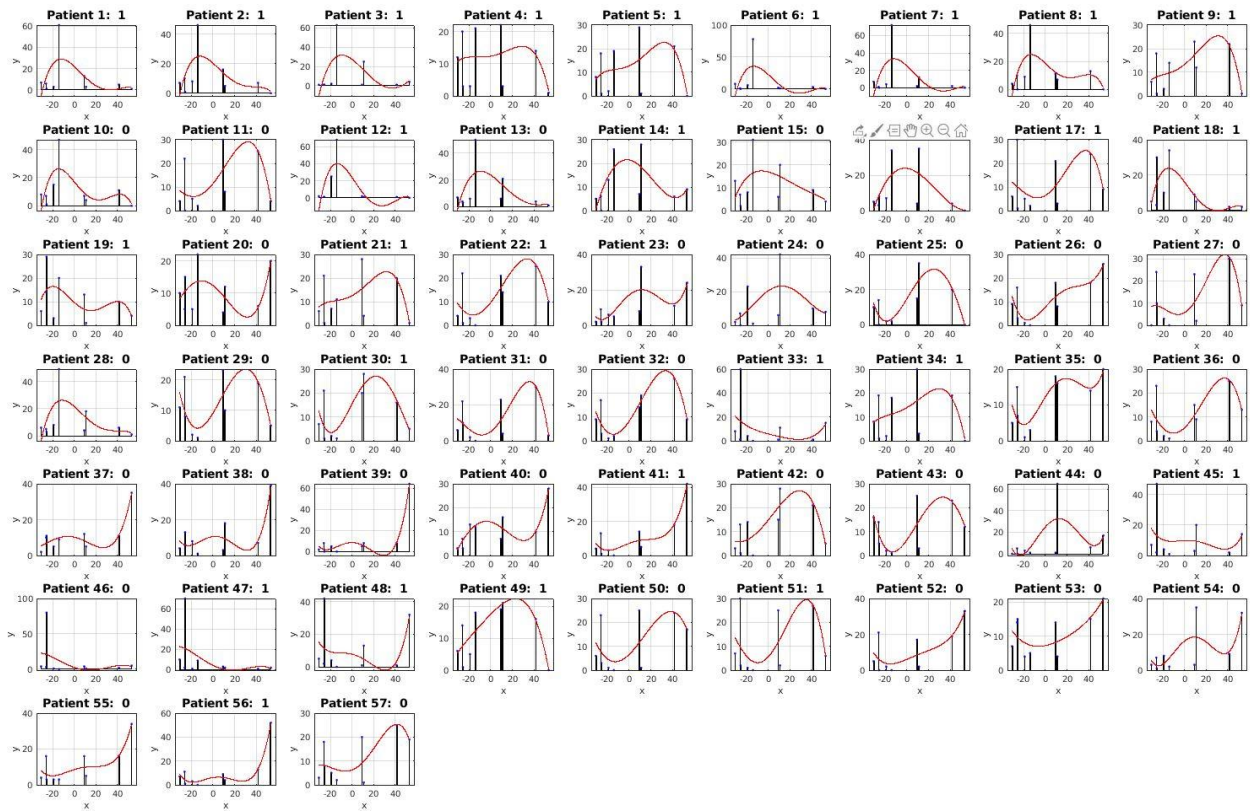

**Figure S1.** Frequency Histograms with the 4<sup>th</sup> polynomial fittings for all 57 cases with labels (0 for eGFR  $\geq 60$  and 1 for eGFR  $< 60$ ). The x-axis represents the distance between cluster groups obtained from MDS and y-axis represents the normalized frequencies of the clusters.

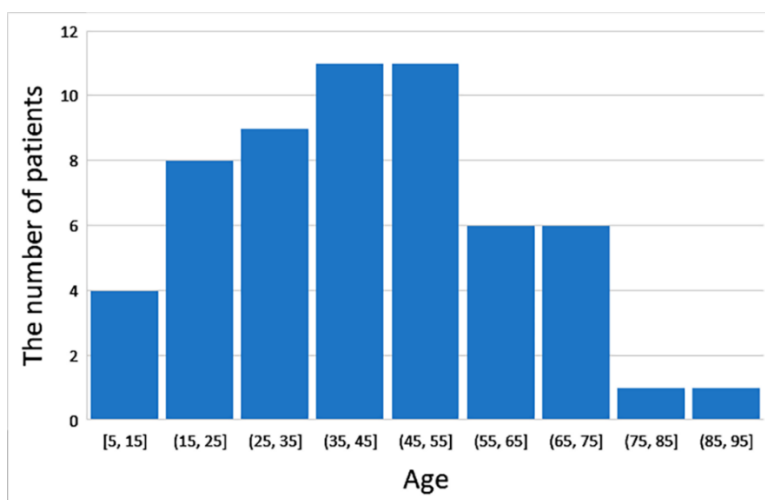

**Figure S2.** Histogram for the patients' age (ranged from 5 to 91)

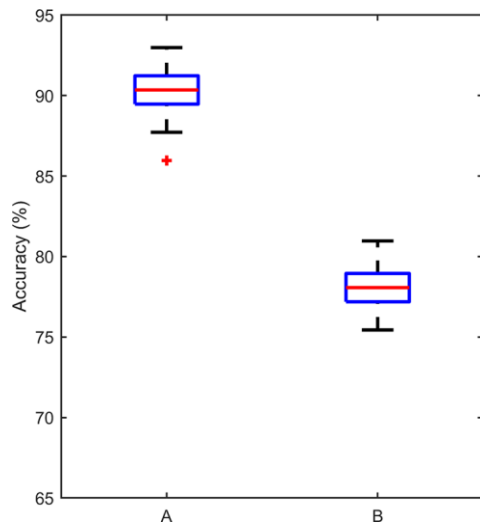

**Figure S3.** Boxplot for the mean accuracy and standard deviation. we performed the classification with a random forest classifier 10 times to compute the mean and standard deviation of the OOB error for the top 7 features. (A) For the prediction of eGFR at the biopsy, the average and standard deviation were 90.17 and 2.22, respectively. (B) For the prediction of eGFR in one year, the average accuracy and standard deviation were 78.27 and 1.74, respectively.

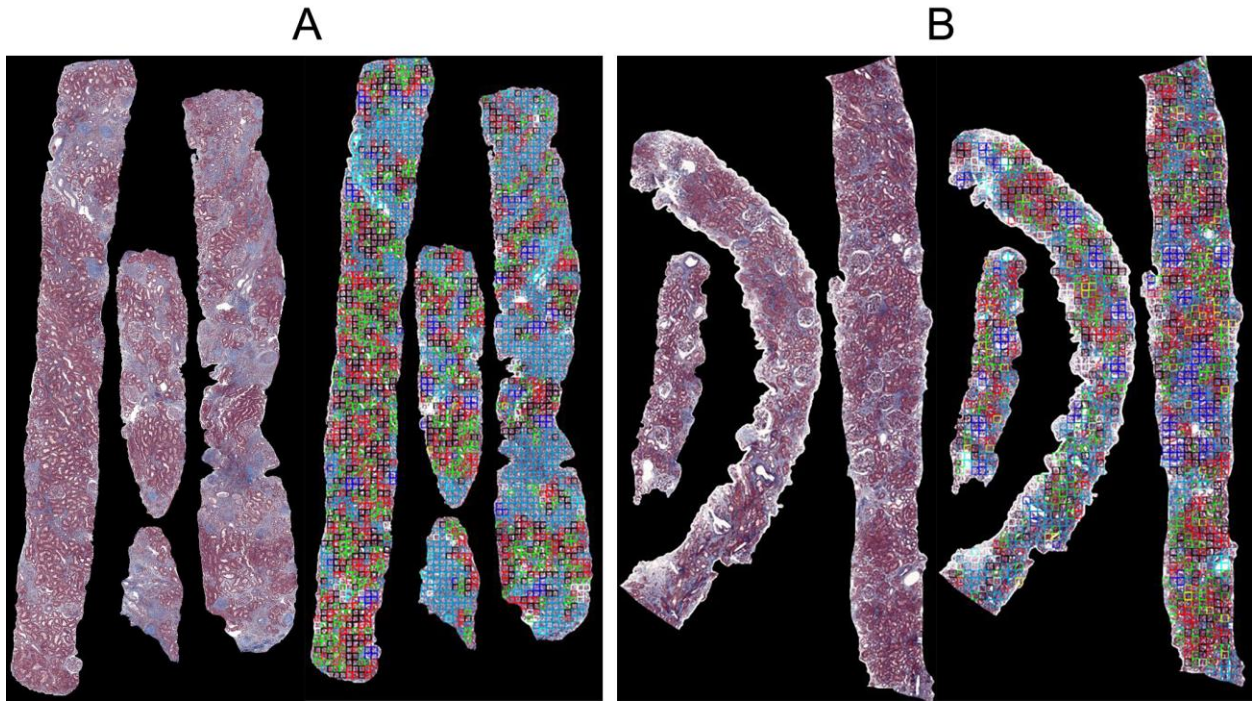

**Figure S4.** Examples of misclassified cases. (A) True eGFR = 49, predicted eGFR  $\geq 60$ ; (B) True eGFR = 97, predicted eGFR  $< 60$
